# Supplementary material
Source: publisher site journal article supplement (https://www.dovepress.com/article/432963)
Supplement: Supplementary file 1 [file get_supplementary_file.php]

**Supplemental Tables**

**Table S1** Demographic Characteristics, among COPD patients initiating budesonide/glycopyrrolate/formoterol fumarate (BGF) following a COPD exacerbation, by delay in BGF initiation

|  | **Prompt Initiation** | | **Delayed initiation** | | **Very delayed initiation** | | **Total Sample** | | ***P – valuea*** |
| --- | --- | --- | --- | --- | --- | --- | --- | --- | --- |
| **n = 434** | | **n = 1,187** | | **n = 788** | | **n = 2,409** | |
| **Mean/n** | **SD/%** | **Mean/n** | **SD/%** | **Mean/n** | **SD/%** | **Mean/n** | **SD/%** |
| **Age (Mean, SD)** | 61.6 | 9.0 | 61.9 | 9.7 | 61.6 | 9.4 | 61.8 | 9.4 | 0.85 |
| **Sex (n, %)** |  |  |  |  |  |  |  |  | 0.21 |
| Male | 149 | 34.3% | 455 | 38.3% | 278 | 35.3% | 882 | 36.6% |  |
| Female | 285 | 65.7% | 732 | 61.7% | 510 | 64.7% | 1527 | 63.4% |  |
| **Race/Ethnicity (n, %)** |  |  |  |  |  |  |  |  | 0.12 |
| White | 252 | 58.1% | 666 | 56.1% | 431 | 54.7% | 1349 | 56.0% |  |
| Black or African American | 34 | 7.8% | 118 | 9.9% | 90 | 11.4% | 242 | 10.0% |  |
| Asian | 3 | 0.7% | 28 | 2.4% | 23 | 2.9% | 54 | 2.2% |  |
| Hispanic or Latino | 15 | 3.5% | 43 | 3.6% | 35 | 4.4% | 93 | 3.9% |  |
| Unknown | 130 | 30.0% | 332 | 28.0% | 209 | 26.5% | 671 | 27.9% |  |
| **Payer Type (n, %)** |  |  |  |  |  |  |  |  | 0.13 |
| Medicare Advantage | 110 | 25.3% | 327 | 27.5% | 213 | 27.0% | 650 | 27.0% |  |
| Managed Medicaid | 185 | 42.6% | 527 | 44.4% | 376 | 47.7% | 1088 | 45.2% |  |
| Commercial | 139 | 32.0% | 333 | 28.1% | 199 | 25.3% | 671 | 27.9% |  |
| **Census Divisions (n, %)** |  |  |  |  |  |  |  |  | 0.19 |
| East North Central | 94 | 21.7% | 225 | 19.0% | 113 | 14.3% | 432 | 17.9% |  |
| East South Central | 57 | 13.1% | 162 | 13.6% | 116 | 14.7% | 335 | 13.9% |  |
| Middle Atlantic | 48 | 11.1% | 148 | 12.5% | 109 | 13.8% | 305 | 12.7% |  |
| Mountain | 16 | 3.7% | 49 | 4.1% | 34 | 4.3% | 99 | 4.1% |  |
| New England | 4 | 0.9% | 20 | 1.7% | 10 | 1.3% | 34 | 1.4% |  |
| Pacific | 14 | 3.2% | 44 | 3.7% | 43 | 5.5% | 101 | 4.2% |  |
| South Atlantic | 55 | 12.7% | 179 | 15.1% | 121 | 15.4% | 355 | 14.7% |  |
| West North Central | 23 | 5.3% | 63 | 5.3% | 36 | 4.6% | 122 | 5.1% |  |
| West South Central | 119 | 27.4% | 292 | 24.6% | 201 | 25.5% | 612 | 25.4% |  |
| Unknown | 4 | 0.9% | 5 | 0.4% | 5 | 0.6% | 14 | 0.6% |  |
| **Days of follow-up (Mean, SD)** | 264.8 | 112.3 | 306.7 | 130.1 | 405.5 | 109.2 | 331 | 131.9 | <.01 |
| 30-59 (n, %) | 0 | 0.0% | 0 | 0.0% | 0 | 0.0% | 0 | 0.0% |  |
| 60-120 (n, %) | 46 | 10.6% | 74 | 6.2% | 0 | 0.0% | 120 | 5.0% |  |
| 121-180 (n, %) | 74 | 17.1% | 170 | 14.3% | 0 | 0.0% | 244 | 10.1% |  |
| 180+ (n, %) | 314 | 72.4% | 943 | 79.4% | 788 | 100.0% | 2045 | 84.9% |  |
| **Comorbidities (n,%)** |  |  |  |  |  |  |  |  |  |
| Abnormal sputum | 2 | 0.5% | 5 | 0.4% | 11 | 1.4% | 18 | 0.7% | 0.04 |
| Acute bronchitis | 66 | 15.2% | 224 | 18.9% | 175 | 22.2% | 465 | 19.3% | 0.01 |
| Acute respiratory failure | 68 | 15.7% | 276 | 23.3% | 206 | 26.1% | 550 | 22.8% | <.01 |
| Allergic rhinitis | 107 | 24.7% | 300 | 25.3% | 212 | 26.9% | 619 | 25.7% | 0.62 |
| Anxiety | 183 | 42.2% | 449 | 37.8% | 366 | 46.4% | 998 | 41.4% | <.01 |
| Asthma | 137 | 31.6% | 383 | 32.3% | 282 | 35.8% | 802 | 33.3% | 0.19 |
| Cancer diagnoses other than basal or squamous cell skin cancer | 37 | 8.5% | 115 | 9.7% | 77 | 9.8% | 229 | 9.5% | 0.74 |
| Cardiovascular disease | 183 | 42.2% | 550 | 46.3% | 390 | 49.5% | 1123 | 46.6% | 0.05 |
| Chronic cough | 0 | 0.0% | 3 | 0.3% | 0 | 0.0% | 3 | 0.1% | 0.21 |
| COVID-19 | 39 | 9.0% | 117 | 9.9% | 75 | 9.5% | 231 | 9.6% | 0.87 |
| Severe COVID-19 | 5 | 1.2% | 17 | 1.4% | 20 | 2.5% | 42 | 1.7% | 0.11 |
| Cystic fibrosis | 1 | 0.2% | 2 | 0.2% | 3 | 0.4% | 6 | 0.2% | 0.65 |
| Osteoarthritis | 142 | 32.7% | 411 | 34.6% | 300 | 38.1% | 853 | 35.4% | 0.13 |
| Depression | 138 | 31.8% | 384 | 32.4% | 288 | 36.5% | 810 | 33.6% | 0.10 |
| Diabetes | 137 | 31.6% | 369 | 31.1% | 254 | 32.2% | 760 | 31.5% | 0.87 |
| Dyspnea | 248 | 57.1% | 713 | 60.1% | 502 | 63.7% | 1463 | 60.7% | 0.06 |
| Fatigue | 84 | 19.4% | 253 | 21.3% | 191 | 24.2% | 528 | 21.9% | 0.11 |
| Gastroesophageal reflux disease | 176 | 40.6% | 510 | 43.0% | 356 | 45.2% | 1042 | 43.3% | 0.28 |
| Interstitial fibrosis | 13 | 3.0% | 42 | 3.5% | 54 | 6.9% | 109 | 4.5% | <.01 |
| Osteoporosis | 46 | 10.6% | 101 | 8.5% | 83 | 10.5% | 230 | 9.5% | 0.23 |
| Pneumonia | 62 | 14.3% | 224 | 18.9% | 186 | 23.6% | 472 | 19.6% | <.01 |
| Pulmonary embolism | 16 | 3.7% | 50 | 4.2% | 42 | 5.3% | 108 | 4.5% | 0.34 |
| Sarcoidosis | 1 | 0.2% | 5 | 0.4% | 5 | 0.6% | 11 | 0.5% | 0.59 |
| Smoking status/tobacco dependence | 220 | 50.7% | 610 | 51.4% | 431 | 54.7% | 1261 | 52.3% | 0.27 |
| Tuberculosis | 2 | 0.5% | 4 | 0.3% | 0 | 0.0% | 6 | 0.2% | 0.21 |
| **Other Therapies During 12-month Baseline Period** | | | | | | | | | |
|  |  |  |  |  |  |  |  |  |  |
| Any maintenance treatment | 421 | 97.0% | 1161 | 97.8% | 772 | 98.0% | 2354 | 97.7% | 0.53 |
| Long-acting maintenance treatment | 355 | 81.8% | 1001 | 84.3% | 694 | 88.1% | 2050 | 85.1% | <.01 |
| Inhaled corticosteroid (ICS) | 121 | 27.9% | 343 | 28.9% | 265 | 33.6% | 729 | 30.3% | 0.04 |
| Long-acting beta agonist (LABA) | 94 | 21.7% | 258 | 21.7% | 215 | 27.3% | 567 | 23.5% | 0.01 |
| Long-acting muscarinic antagonist (LAMA) | 104 | 24.0% | 355 | 29.9% | 258 | 32.7% | 717 | 29.8% | <.01 |
| LAMA/LABAb | 80 | 18.4% | 231 | 19.5% | 149 | 18.9% | 460 | 19.1% | 0.89 |
| ICS/LABAb | 259 | 59.7% | 734 | 61.8% | 518 | 65.7% | 1511 | 62.7% | 0.08 |
| Short-acting maintenance treatment or oral corticosteroid (OCS) | 395 | 91.0% | 1106 | 93.2% | 740 | 93.9% | 2241 | 93.0% | 0.16 |
| Short-acting maintenance treatment | 368 | 84.8% | 1038 | 87.4% | 694 | 88.1% | 2100 | 87.2% | 0.241 |
| Short-acting beta agonist (SABA | 354 | 81.6% | 986 | 83.1% | 657 | 83.4% | 1997 | 82.9% | 0.71 |
| Short-acting muscarinic antagonist (SAMA) | 32 | 7.4% | 115 | 9.7% | 97 | 12.3% | 244 | 10.1% | 0.02 |
| SABA/SAMA | 125 | 28.8% | 353 | 29.7% | 255 | 32.4% | 733 | 30.4% | 0.33 |
| OCS | 270 | 62.2% | 804 | 67.7% | 570 | 72.3% | 1644 | 68.2% | <.01 |
| Other maintenance treatment | 17 | 3.9% | 66 | 5.6% | 47 | 6.0% | 130 | 5.4% | 0.29 |
| Methylxanthine | 4 | 0.9% | 17 | 1.4% | 15 | 1.9% | 36 | 1.5% | 0.39 |
| Mucolytic agent | 2 | 0.5% | 2 | 0.2% | 1 | 0.1% | 5 | 0.2% | 0.43 |
| PDE-4 inhibitor | 12 | 2.8% | 48 | 4.0% | 33 | 4.2% | 93 | 3.9% | 0.42 |
| Any inhaled therapy | 376 | 86.6% | 1075 | 90.6% | 729 | 92.5% | 2180 | 90.5% | 0.004 |
| Any combination therapy | 316 | 72.8% | 960 | 80.9% | 672 | 85.3% | 1948 | 80.9% | <.01 |
| Monotherapy only | 103 | 23.7% | 208 | 17.5% | 102 | 12.9% | 413 | 17.1% | <.01 |

**Notes**: a*P* <.05 is considered statistically significant. b*Fixed combination products only.* **Abbreviations**: ICS, inhaled corticosteroid; LABA, long-acting β2-agonist; LAMA, long-acting muscarinic antagonist; OCS, oral corticosteroids; PDE, Phosphodiesterase; SABA, Short-Acting Beta Agonists; SAMA, short-acting muscarinic antagonists

**Table S2** Annualized rates of COPD exacerbations, following initiation of BGF, among patients initiating BGF following a COPD exacerbation, by category of maintenance therapy used in the 30-day period prior to BGF initiation

|  |  | **95% Confidence Interval** | |
| --- | --- | --- | --- |
|  | **Ratea** | **Lower** | **Upper** |
| **Treatment Group** |  |  |  |
| Prompt BGF initiation patients (n = 434) | 1.52 | 1.39 | 1.66 |
| Combined delayed and very delayed BGF initiation patients (n = 1,975) | 2.14 | 2.07 | 2.21 |
| Therapies in the 30-day period prior to BGF initiationb |  |  |  |
| Any long-acting maintenance (n = 927) | 2.20 | 2.10 | 2.30 |
| Any ICS (mono or open dual) (n=239) | 2.19 | 2.00 | 2.39 |
| ICS mono (n=92) | 2.19 | 1.90 | 2.52 |
| LABA mono (n=23) | 2.47 | 1.90 | 3.22 |
| LAMA mono (n=229) | 2.57 | 2.37 | 2.79 |
| ICS mono (n=92) | 2.19 | 1.90 | 2.52 |
| Any fixed dual (n=740)c | 2.22 | 2.11 | 2.33 |
| ICS/LABA (n=595)c | 2.25 | 2.13 | 2.37 |
| LABA/LAMA (n=162)c | 2.17 | 1.95 | 2.42 |
| Short-acting only/No maintenance therapy (n=447) | 2.61 | 2.46 | 2.77 |

**Notes**: aRate per 365 days; bTherapy categories listed are not mutually exclusive, and do not include the full sample of patients in the delayed and very delayed cohorts. Data was not reported for methylxanthine, mucolytic agent, and PDE-4 inhibitors, resulting in rates higher than the combined average of 2.14; cFixed combinations only.

**Abbreviations**: BGF, budesonide/glycopyrrolate/formoterol fumarate; ICS, inhaled corticosteroid; LABA, long-acting β2-agonist; LAMA, long-acting muscarinic antagonist.

**Table S3** Baseline and follow-up COPD-related healthcare resource utilization and costs, among COPD patients initiating budesonide/glycopyrrolate/formoterol fumarate (BGF) following a COPD exacerbation, by delay in BGF initiation

|  | **Prompt Initiation** | | **Delayed initiation** | | **Very delayed initiation** | | ***p - valuea*** |
| --- | --- | --- | --- | --- | --- | --- | --- |
| **n = 434** | | **n = 1187** | | **n = 788** | |
| **n** | **%** | **n** | **%** | **n** | **%** |
|  | **12-Month Baseline Period Preceding the Index Exacerbation Date** | | | | | | |
| **Healthcare Utilizationb** |  |  |  |  |  |  |  |
| **Emergency Department Visits** |  |  |  |  |  |  |  |
| Total (Mean, SD) | 0.27 | 0.74 | 0.32 | 0.82 | 0.47 | 1.52 | 0.32 |
| Patients with ≥ 1 Visit (n,%) | 78 | 17.97% | 242 | 20.39% | 166 | 21.07% | 0.42 |
| **Urgent Care Visits** |  |  |  |  |  |  |  |
| Total (Mean, SD) | 0.01 | 0.12 | 0.03 | 0.18 | 0.03 | 0.18 | 0.41 |
| Patients with ≥ 1 Visit | 6 | 1.38% | 29 | 2.44% | 19 | 2.41% | 0.41 |
| **Inpatient Hospital** |  |  |  |  |  |  |  |
| Total (Mean, SD) | 0.00 | 0.05 | 0.02 | 0.14 | 0.12 | 0.56 | 0.00 |
| Length of stay | 4.00 | N/A | 3.93 | 1.90 | 4.67 | 2.18 | 0.19 |
| Patients with ≥ 1 Visit | 1 | 0.23% | 21 | 1.77% | 60 | 7.61% | 0.00 |
| **Healthcare Expenditureb** |  |  |  |  |  |  |  |
| **Emergency Department (Mean, SD)** | $197 | $571 | $282 | $815 | $362 | $1,126 | 0.42 |
| Median | $0 | - | $0 | - | $0 | - |  |
| Costs among patients with ≥ 1 visit | $1,096 | $915 | $1,384 | $1,318 | $1,716 | $1,927 | 0.23 |
| **Urgent Care (Mean, SD)** | $3 | $30 | $4 | $29 | $4 | $35 | 0.60 |
| Median | $0 | - | $0 | - | $0 | - | - |
| Costs among patients with ≥ 1 visit | $212 | $157 | $146 | $118 | $171 | $156 | 0.66 |
| **Inpatient Hospital (Mean, SD)** | $19 | $397 | $132 | $1,036 | $937 | $4,070 | 0.00 |
| Median | $0 | - | $0 | - | $0 | - | - |
| Costs among patients with ≥ 1 visit | $8,281 | N/A | $7,460 | $2,508 | $12,300 | $8,877 | 0.05 |
| **Pharmacy (Mean, SD)** | $3,265 | $3,700 | $3,952 | $4,599 | $4,457 | $5,048 | 0.00 |
| Median | $1,946 | - | $2,565 |  | $3,162 | - | - |
| Costs among patients with ≥ 1 fill | $3,295 | $3,704 | $4,012 | $4,608 | $4,526 | $5,056 | 0.00 |
| **Total Medical (Mean, SD)c** | $1,280 | $3,616 | $1,710 | $3,942 | $2,865 | $6,578 | 0.00 |
| Median | $443 | - | $571 | - | $725 | - | 0.00 |
| **Total Healthcare (Mean, SD)d** | $4,544 | $5,930 | $5,661 | $6,230 | $7,322 | $8,907 | 0.00 |
| Median | $3,024 | - | $3,838 | - | $4,519 | - | - |
|  | **Annualized During Variable Length Period Following the Index Exacerbation Datee** | | | | | | |
| **Healthcare Utilization** |  |  |  |  |  |  |  |
| **Emergency Department Visits** |  |  |  |  |  |  |  |
| Total (Mean, SD) | 0.33 | 1.02 | 0.47 | 1.50 | 0.54 | 1.45 | 0.00 |
| **Urgent Care Visits** |  |  |  |  |  |  |  |
| Total (Mean, SD) | 0.05 | 0.31 | 0.07 | 0.40 | 0.09 | 0.44 | 0.04 |
| **Inpatient Hospital** |  |  |  |  |  |  |  |
| Total (Mean, SD) | 0.17 | 0.55 | 0.26 | 0.82 | 0.31 | 0.80 | 0.00 |
| **Healthcare Expenditure** |  |  |  |  |  |  |  |
| **Emergency Department (Mean, SD)** | $269 | $1,108 | $375 | $1,369 | $369 | $1,010 | 0.00 |
| Median | $0 | - | $0 | - | $0 | - | - |
| **Urgent Care (Mean, SD)** | $7 | $45 | $10 | $65 | $12 | $68 | 0.03 |
| Median | $0 | - | $0 | - | $0 | - | - |
| **Inpatient Hospital (Mean, SD)** | $1,362 | $5,570 | $1,946 | $6,659 | $2,531 | $7,008 | 0.00 |
| Median | $0 | - | $0 | - | $0 | - | - |
| **Pharmacy (Mean, SD)** | $1,590 | $2,715 | $3,149 | $9,855 | $3,821 | $6,092 | 0.00 |
| Median | $545 | - | $1,533 | - | $2,515 | - | - |
| **Total Medical (Mean, SD)c** | $3,412 | $7,363 | $4,490 | $9,166 | $4,903 | $8,941 | 0.00 |
| Median | $1,067 | - | $1,246 | - | $1,362 | - | 0.00 |
| **Total Healthcare (Mean, SD)d** | $5,002 | $8,204 | $7,639 | $14,123 | $8,724 | $11,206 | 0.00 |
| Median | $2,235 | - | $3,786 | - | $5,076 | - |  |

**Notes**: a*P* <.05 is considered statistically significant; analysis of variance (ANOVA) for normally distributed continuous variables, Kuskal-Walis test was used for skewed variables; bCOPD-related healthcare resource use and costs are based on inpatient claims with a COPD diagnosis in the primary position, and outpatient claims with a COPD diagnosis in any position; cTotal medical costs include total physician office / clinic, emergency department, urgent care, telehealth, other outpatient, skilled nursing facility, and inpatient hospital costs; dTotal healthcare costs include total pharmacy, physician office / clinic, emergency department, urgent care, telehealth, other outpatient, skilled nursing facility, and inpatient hospital costs; eFollow-up period outcomes are expressed as per patient per year (PPPY) metrics over each patient’s unique follow-up period.
